# Supplementary material for: Examining the Impact of Urban Morphology on Seasonal Land Surface Temperatures: Comparing Grid‐ and Block‐Based Approaches
Source: Preprints.org preprint supplement (doi:10.20944/preprints202308.0604.v1), 2023-08-08
Supplement: Supplementary file 3 [file supplementary]

**Supplementary File**

Table S1. Correlation matrix of seasonal land surface temperatures and explanatory variables at the grid level (N=34,135)

|  | LST spring | LST summer | LST autumn | LST winter | NDVI spring | NDVI summer | NDVI autumn | NDVI winter | Albedo spring | Albedo summer | Albedo autumn | Albedo winter | Residential % | Commercial % | Industrial % | Cultural & Recreational % | Transport % | Public % | Other uses % | Entropy index | Building density | Old buildings % | Ave. BCR | Ave. FAR | Ave. TFA | Ave. BH | GIUF | GIWB |
| --- | --- | --- | --- | --- | --- | --- | --- | --- | --- | --- | --- | --- | --- | --- | --- | --- | --- | --- | --- | --- | --- | --- | --- | --- | --- | --- | --- | --- |
| LST spring | 1 | .475** | .661** | .772** | .263** | .157** | .249** | .355** | .491** | .414** | .517** | .505** | -.063** | .032** | .086** | .062** | -.243** | .029** | .182** | -.280** | .102** | .089** | -.038** | -.187** | -.229** | -.387** | -.073** | -0.009 |
| LST summer | .475** | 1 | .598** | .311** | -.238** | -.596** | -.349** | -.217** | -.085** | -.106** | -.045** | -.095** | .299** | .368** | .114** | .018** | .082** | .049** | -.556** | .202** | .481** | .285** | .471** | .236** | -.141** | -.083** | -.139** | -.152** |
| LST autumn | .661** | .598** | 1 | .740** | .095** | -.089** | .135** | .185** | .167** | .137** | .231** | .248** | .044** | .138** | .113** | .025** | -.026** | 0.0102 | -.120** | -.103** | .162** | .102** | .112** | -0.002 | -.143** | -.208** | -.097** | .056** |
| LST winter | .772** | .311** | .740** | 1 | .247** | .163** | .316** | .384** | .435** | .366** | .526** | .523** | -.141** | -.032** | .053** | .049** | -.106** | .022** | .191** | -.270** | -.059** | -.018** | -.139** | -.186** | -.163** | -.303** | -.147** | .174** |
| NDVI spring | .263** | -.238** | .095** | .247** | 1 | .702** | .826** | .918** | .414** | .417** | .431** | .414** | -.124** | -.279** | .028** | .141** | -.385** | .125** | .484** | -.141** | -.171** | -.065** | -.301** | -.337** | -.096** | -.299** | .190** | .090** |
| NDVI summer | .157** | -.596** | -.089** | .163** | .702** | 1 | .823** | .699** | .298** | .335** | .340** | .319** | -.331** | -.420** | -.036** | .036** | -.296** | -.024** | .746** | -.336** | -.428** | -.187** | -.519** | -.411** | -.020** | -.193** | .061** | .157** |
| NDVI autumn | .249** | -.349** | .135** | .316** | .826** | .823** | 1 | .868** | .342** | .364** | .449** | .389** | -.272** | -.337** | -0.007 | .087** | -.275** | .044** | .598** | -.239** | -.320** | -.099** | -.401** | -.358** | -.071** | -.266** | .063** | .185** |
| NDVI winter | .355** | -.217** | .185** | .384** | .918** | .699** | .868** | 1 | .444** | .430** | .511** | .498** | -.170** | -.273** | .020** | .122** | -.347** | .093** | .504** | -.203** | -.197** | -.088** | -.316** | -.332** | -.106** | -.308** | .102** | .108** |
| Albedo spring | .491** | -.085** | .167** | .435** | .414** | .298** | .342** | .444** | 1 | .906** | .829** | .904** | -.267** | -.158** | .047** | .095** | -.229** | .140** | .419** | -.309** | -.196** | -.105** | -.311** | -.324** | -.124** | -.353** | -.030** | .061** |
| Albedo summer | .414** | -.106** | .137** | .366** | .417** | .335** | .364** | .430** | .906** | 1 | .799** | .817** | -.319** | -.152** | .058** | .088** | -.171** | .171** | .406** | -.271** | -.235** | -.081** | -.319** | -.318** | -.097** | -.331** | -0.01 | .090** |
| Albedo autumn | .517** | -.045** | .231** | .526** | .431** | .340** | .449** | .511** | .829** | .799** | 1 | .843** | -.277** | -.148** | .046** | .076** | -.168** | .112** | .388** | -.335** | -.202** | -.097** | -.303** | -.305** | -.116** | -.336** | -.020** | .094** |
| Albedo winter | .505** | -.095** | .248** | .523** | .414** | .319** | .389** | .498** | .904** | .817** | .843** | 1 | -.252** | -.162** | .036** | .096** | -.229** | .117** | .416** | -.328** | -.201** | -.123** | -.315** | -.314** | -.116** | -.333** | -0.009 | .082** |
| Residential % | -.063** | .299** | .044** | -.141** | -.124** | -.331** | -.272** | -.170** | -.267** | -.319** | -.277** | -.252** | 1 | -.096** | -.067** | -.119** | -.346** | -.123** | -.444** | .230** | .767** | .139** | .519** | .179** | -.125** | -.012* | .118** | -.154** |
| Commercial % | .032** | .368** | .138** | -.032** | -.279** | -.420** | -.337** | -.273** | -.158** | -.152** | -.148** | -.162** | -.096** | 1 | .019** | -.142** | .043** | -.134** | -.478** | .158** | .255** | .228** | .429** | .445** | .068** | .123** | -.144** | -.107** |
| Industrial % | .086** | .114** | .113** | .053** | .028** | -.036** | -0.007 | .020** | .047** | .058** | .046** | .036** | -.067** | .019** | 1 | -.017** | 0.0071 | -.027** | -.055** | .040** | -.031** | .085** | .023** | .011* | 0.0062 | -0.003 | -.039** | .025** |
| Cultural &  Recreational % | .062** | .018** | .025** | .049** | .141** | .036** | .087** | .122** | .095** | .088** | .076** | .096** | -.119** | -.142** | -.017** | 1 | -.077** | .074** | -0.001 | .129** | -.136** | -.080** | -.140** | -.112** | 0.0007 | -.013* | .027** | .023** |
| Transport % | -.243** | .082** | -.026** | -.106** | -.385** | -.296** | -.275** | -.347** | -.229** | -.171** | -.168** | -.229** | -.346** | .043** | 0.0071 | -.077** | 1 | -.086** | -.440** | .078** | -.337** | -.052** | -.080** | .113** | .130** | .180** | -.078** | .086** |
| Public % | .029** | .049** | 0.0102 | .022** | .125** | -.024** | .044** | .093** | .140** | .171** | .112** | .117** | -.123** | -.134** | -.027** | .074** | -.086** | 1 | -.056** | .263** | -.085** | -.033** | -.028** | -.048** | -.022** | -.045** | .048** | -0.009 |
| Other uses % | .182** | -.556** | -.120** | .191** | .484** | .746** | .598** | .504** | .419** | .406** | .388** | .416** | -.444** | -.478** | -.055** | -0.001 | -.440** | -.056** | 1 | -.451** | -.478** | -.194** | -.589** | -.458** | -.027** | -.180** | .030** | .123** |
| Entropy index | -.280** | .202** | -.103** | -.270** | -.141** | -.336** | -.239** | -.203** | -.309** | -.271** | -.335** | -.328** | .230** | .158** | .040** | .129** | .078** | .263** | -.451** | 1 | .213** | .145** | .389** | .233** | 0.0026 | .209** | .058** | -.066** |
| Building density | .102** | .481** | .162** | -.059** | -.171** | -.428** | -.320** | -.197** | -.196** | -.235** | -.202** | -.201** | .767** | .255** | -.031** | -.136** | -.337** | -.085** | -.478** | .213** | 1 | .306** | .665** | .278** | -.183** | -.073** | 0.0088 | -.161** |
| Old buildings % | .089** | .285** | .102** | -.018** | -.065** | -.187** | -.099** | -.088** | -.105** | -.081** | -.097** | -.123** | .139** | .228** | .085** | -.080** | -.052** | -.033** | -.194** | .145** | .306** | 1 | .305** | .152** | -.065** | -.074** | -.034** | -.055** |
| Ave. building coverage ratio (BCR) | -.038** | .471** | .112** | -.139** | -.301** | -.519** | -.401** | -.316** | -.311** | -.319** | -.303** | -.315** | .519** | .429** | .023** | -.140** | -.080** | -.028** | -.589** | .389** | .665** | .305** | 1 | .724** | -.061** | .150** | -0.007 | -.178** |
| Ave. floor area ratio (FAR) | -.187** | .236** | -0.002 | -.186** | -.337** | -.411** | -.358** | -.332** | -.324** | -.318** | -.305** | -.314** | .179** | .445** | .011* | -.112** | .113** | -.048** | -.458** | .233** | .278** | .152** | .724** | 1 | .266** | .452** | -.072** | -.128** |
| Ave. total floor area (TFA) | -.229** | -.141** | -.143** | -.163** | -.096** | -.020** | -.071** | -.106** | -.124** | -.097** | -.116** | -.116** | -.125** | .068** | 0.0062 | 0.0007 | .130** | -.022** | -.027** | 0.0026 | -.183** | -.065** | -.061** | .266** | 1 | .565** | -.045** | 0.0038 |
| Ave. building height (BH) | -.387** | -.083** | -.208** | -.303** | -.299** | -.193** | -.266** | -.308** | -.353** | -.331** | -.336** | -.333** | -.012* | .123** | -0.003 | -.013* | .180** | -.045** | -.180** | .209** | -.073** | -.074** | .150** | .452** | .565** | 1 | -.030** | -.058** |
| Gravity index for urban forests (GIUF) | -.073** | -.139** | -.097** | -.147** | .190** | .061** | .063** | .102** | -.030** | -0.01 | -.020** | -0.009 | .118** | -.144** | -.039** | .027** | -.078** | .048** | .030** | .058** | 0.0088 | -.034** | -0.007 | -.072** | -.045** | -.030** | 1 | -.149** |
| Gravity index for water bodies (GIWB) | -0.009 | -.152** | .056** | .174** | .090** | .157** | .185** | .108** | .061** | .090** | .094** | .082** | -.154** | -.107** | .025** | .023** | .086** | -0.009 | .123** | -.066** | -.161** | -.055** | -.178** | -.128** | 0.0038 | -.058** | -.149** | 1 |

Table S2. Correlation matrix of seasonal land surface temperatures and explanatory variables at the block level (N=4,553)

|  | LST spring | LST summer | LST autumn | LST winter | NDVI spring | NDVI summer | NDVI autumn | NDVI winter | Albedo spring | Albedo summer | Albedo autumn | Albedo winter | Residential % | Commercial % | Industrial % | Cultural & Recreational % | Transport % | Public % | Other uses % | Entropy index | Building density | Old buildings % | Ave. BCR | Ave. FAR | Ave. TFA | Ave. BH | GIUF | GIWB |
| --- | --- | --- | --- | --- | --- | --- | --- | --- | --- | --- | --- | --- | --- | --- | --- | --- | --- | --- | --- | --- | --- | --- | --- | --- | --- | --- | --- | --- |
| LST spring | 1 | .699** | .704** | .709** | .211** | -.091** | .129** | .267** | .503** | .429** | .509** | .494** | .212** | .138** | .123** | 0.0095 | -.354** | .101** | -.098** | .111** | .447** | .384** | .213** | -.256** | -.216** | -.430** | -.043** | -0.004 |
| LST summer | .699** | 1 | .663** | .499** | -.225** | -.593** | -.365** | -.206** | .131** | .053** | .117** | .087** | .368** | .409** | .131** | -.127** | -.137** | 0.0177 | -.582** | .119** | .616** | .361** | .436** | -.036* | -.201** | -.313** | -.403** | -0.014 |
| LST autumn | .704** | .663** | 1 | .807** | .060** | -.213** | .047** | .145** | .202** | .132** | .361** | .332** | .195** | .272** | .161** | -.058** | -.163** | -0.01 | -.289** | .061** | .349** | .222** | .240** | -.077** | -.154** | -.279** | -.149** | 0.0216 |
| LST winter | .709** | .499** | .807** | 1 | .072** | -.137** | .097** | .200** | .383** | .286** | .502** | .508** | .097** | .154** | .093** | 0.0057 | -.127** | 0.0066 | -.133** | .048** | .205** | .154** | .101** | -.140** | -.140** | -.276** | -.164** | .144** |
| NDVI spring | .211** | -.225** | .060** | .072** | 1 | .758** | .858** | .946** | .396** | .431** | .459** | .413** | 0.0223 | -.414** | .056** | .202** | -.398** | .244** | .487** | .159** | -.092** | 0.0231 | -.206** | -.384** | -.111** | -.289** | .500** | -.065** |
| NDVI summer | -.091** | -.593** | -.213** | -.137** | .758** | 1 | .886** | .734** | .140** | .250** | .222** | .169** | -.271** | -.552** | -0.015 | .243** | -.186** | .138** | .762** | .065** | -.454** | -.124** | -.418** | -.279** | 0.0253 | -0.002 | .521** | -0.016 |
| NDVI autumn | .129** | -.365** | .047** | .097** | .858** | .886** | 1 | .889** | .300** | .370** | .466** | .365** | -.151** | -.453** | 0.0205 | .230** | -.282** | .195** | .622** | .125** | -.279** | -1E-03 | -.290** | -.310** | -.042** | -.151** | .480** | -0.003 |
| NDVI winter | .267** | -.206** | .145** | .200** | .946** | .734** | .889** | 1 | .446** | .461** | .553** | .524** | -0.011 | -.385** | .047** | .203** | -.378** | .228** | .490** | .131** | -.104** | .039** | -.202** | -.350** | -.091** | -.266** | .449** | -.047** |
| Albedo spring | .503** | .131** | .202** | .383** | .396** | .140** | .300** | .446** | 1 | .917** | .794** | .883** | -.049** | -.150** | .111** | .124** | -.242** | .298** | .244** | .113** | .058** | .184** | -.112** | -.302** | -.083** | -.316** | .045** | 0.0067 |
| Albedo summer | .429** | .053** | .132** | .286** | .431** | .250** | .370** | .461** | .917** | 1 | .759** | .791** | -.171** | -.169** | .121** | .144** | -.172** | .331** | .322** | .126** | -.047** | .209** | -.161** | -.275** | -.049** | -.252** | .100** | 0.0188 |
| Albedo autumn | .509** | .117** | .361** | .502** | .459** | .222** | .466** | .553** | .794** | .759** | 1 | .833** | -.053** | -.120** | .114** | .097** | -.257** | .248** | .251** | .090** | .057** | .190** | -.086** | -.278** | -.078** | -.295** | .116** | -0.005 |
| Albedo winter | .494** | .087** | .332** | .508** | .413** | .169** | .365** | .524** | .883** | .791** | .833** | 1 | -.034* | -.132** | .088** | .130** | -.271** | .254** | .248** | .092** | .038* | .137** | -.111** | -.274** | -.074** | -.286** | .100** | -0.013 |
| Residential % | .212** | .368** | .195** | .097** | 0.0223 | -.271** | -.151** | -0.011 | -.049** | -.171** | -.053** | -.034* | 1 | -.217** | -.101** | -.203** | -.527** | -.138** | -.417** | .088** | .736** | 0.0289 | .333** | -.244** | -.223** | -.387** | -0.004 | -.044** |
| Commercial % | .138** | .409** | .272** | .154** | -.414** | -.552** | -.453** | -.385** | -.150** | -.169** | -.120** | -.132** | -.217** | 1 | .039** | -.263** | .149** | -.223** | -.544** | -.144** | .184** | .187** | .359** | .387** | 0.0127 | .049** | -.292** | -.051** |
| Industrial % | .123** | .131** | .161** | .093** | .056** | -0.015 | 0.0205 | .047** | .111** | .121** | .114** | .088** | -.101** | .039** | 1 | -0.019 | 0.0271 | -0.017 | -.039** | .063** | -.062** | .109** | 0.0004 | -0.01 | -0.002 | -0.009 | -.029* | .057** |
| Cultural &  Recreational % | 0.0095 | -.127** | -.058** | 0.0057 | .202** | .243** | .230** | .203** | .124** | .144** | .097** | .130** | -.203** | -.263** | -0.019 | 1 | 0.0088 | .312** | .199** | .344** | -.260** | -.117** | -.219** | -.126** | 0.0276 | .058** | .056** | .033* |
| Transport % | -.354** | -.137** | -.163** | -.127** | -.398** | -.186** | -.282** | -.378** | -.242** | -.172** | -.257** | -.271** | -.527** | .149** | 0.0271 | 0.0088 | 1 | -.075** | -.288** | -.133** | -.518** | -.161** | -.201** | .334** | .231** | .423** | -.269** | .129** |
| Public % | .101** | 0.0177 | -0.01 | 0.0066 | .244** | .138** | .195** | .228** | .298** | .331** | .248** | .254** | -.138** | -.223** | -0.017 | .312** | -.075** | 1 | .097** | .436** | -.128** | -0.004 | -.071** | -.113** | -.039** | -.075** | .032* | -0.024 |
| Other uses % | -.098** | -.582** | -.289** | -.133** | .487** | .762** | .622** | .490** | .244** | .322** | .251** | .248** | -.417** | -.544** | -.039** | .199** | -.288** | .097** | 1 | -.037* | -.446** | -.045** | -.417** | -.236** | .056** | .063** | .406** | -0.017 |
| Entropy index | .111** | .119** | .061** | .048** | .159** | .065** | .125** | .131** | .113** | .126** | .090** | .092** | .088** | -.144** | .063** | .344** | -.133** | .436** | -.037* | 1 | -0.011 | -0.01 | .112** | -.211** | -.144** | -.169** | -6E-04 | .034* |
| Building density | .447** | .616** | .349** | .205** | -.092** | -.454** | -.279** | -.104** | .058** | -.047** | .057** | .038* | .736** | .184** | -.062** | -.260** | -.518** | -.128** | -.446** | -0.011 | 1 | .272** | .507** | -.161** | -.264** | -.441** | -.126** | -.046** |
| Old buildings % | .384** | .361** | .222** | .154** | 0.0231 | -.124** | -1E-03 | .039** | .184** | .209** | .190** | .137** | 0.0289 | .187** | .109** | -.117** | -.161** | -0.004 | -.045** | -0.01 | .272** | 1 | .217** | -0.018 | -.136** | -.201** | -.073** | 0.0272 |
| Ave. building coverage ratio (BCR) | .213** | .436** | .240** | .101** | -.206** | -.418** | -.290** | -.202** | -.112** | -.161** | -.086** | -.111** | .333** | .359** | 0.0004 | -.219** | -.201** | -.071** | -.417** | .112** | .507** | .217** | 1 | .381** | -.148** | -.143** | -.115** | -.044** |
| Ave. floor area ratio (FAR) | -.256** | -.036* | -.077** | -.140** | -.384** | -.279** | -.310** | -.350** | -.302** | -.275** | -.278** | -.274** | -.244** | .387** | -0.01 | -.126** | .334** | -.113** | -.236** | -.211** | -.161** | -0.018 | .381** | 1 | .366** | .589** | -.168** | -.036* |
| Ave. total floor area (TFA) | -.216** | -.201** | -.154** | -.140** | -.111** | 0.0253 | -.042** | -.091** | -.083** | -.049** | -.078** | -.074** | -.223** | 0.0127 | -0.002 | 0.0276 | .231** | -.039** | .056** | -.144** | -.264** | -.136** | -.148** | .366** | 1 | .645** | -.056** | .044** |
| Ave. building height (BH) | -.430** | -.313** | -.279** | -.276** | -.289** | -0.002 | -.151** | -.266** | -.316** | -.252** | -.295** | -.286** | -.387** | .049** | -0.009 | .058** | .423** | -.075** | .063** | -.169** | -.441** | -.201** | -.143** | .589** | .645** | 1 | -.095** | 0.0281 |
| Gravity index for urban forests (GIUF) | -.043** | -.403** | -.149** | -.164** | .500** | .521** | .480** | .449** | .045** | .100** | .116** | .100** | -0.004 | -.292** | -.029* | .056** | -.269** | .032* | .406** | -6E-04 | -.126** | -.073** | -.115** | -.168** | -.056** | -.095** | 1 | -.159** |
| Gravity index for water bodies (GIWB) | -0.004 | -0.014 | 0.0216 | .144** | -.065** | -0.016 | -0.003 | -.047** | 0.0067 | 0.0188 | -0.005 | -0.013 | -.044** | -.051** | .057** | .033* | .129** | -0.024 | -0.017 | .034* | -.046** | 0.0272 | -.044** | -.036* | .044** | 0.0281 | -.159** | 1 |

Table S3. Ordinary least squared (OLS) estimation results at the grid level (N=34,135).

| Variable | | Spring  LST | Summer LST | Autumn LST | Winter  LST |
| --- | --- | --- | --- | --- | --- |
| Constant | | 16.798*** | 38.879*** | 9.6405*** | -5.9484*** |
| NDVI | | 3.5504*** | -9.4115*** | 7.8410*** | 11.920*** |
| Albedo | | 0.3676*** | 0.0957*** | 0.1427*** | 0.3277*** |
| Land use  type proportion | Residential | -0.0093*** | 0.0104*** | 0.0099*** | 0.0027*** |
| Commercial | 0.0076*** | 0.0267*** | 0.0181*** | 0.0072*** |
| Industrial | 0.0390*** | 0.0851*** | 0.0480*** | 0.0135*** |
| Cultural & Recreational | 0.0229*** | 0.0505*** | 0.0215*** | 0.0086*** |
| Transport | -0.0023*** | 0.0190*** | 0.0130*** | 0.0066*** |
| Public | 0.0064*** | 0.0341*** | 0.0164*** | 0.0044*** |
| Land use diversity | Entropy Index | -2.2208*** | -1.1902*** | -1.2131*** | -1.0388*** |
| Building  2-D form | Count of buildings | 0.0182*** | 0.0257*** | 0.0079*** | 0.0020*** |
| % of old buildings (+35 years) | 0.0036*** | 0.0080*** | 0.0010*** | 0.0006*** |
| Average building coverage ratio | 0.0113*** | 0.0182*** | 0.0056*** | 0.0039*** |
| Building  3-D form | Average floor area ratio | -0.0016*** | -0.0026*** | -0.0006*** | -0.0004*** |
| Average total floor area | -6.8e-06*** | -5.4e-06*** | -4.7e-06*** | -6.3e-06*** |
| Average building height | -0.0122*** | -0.0124*** | -0.0038*** | -0.0036*** |
| Natural area | Gravity index for urban forests | -0.0038*** | -0.0098*** | -0.0030*** | -0.0055*** |
| Gravity index for water bodies | -0.0014*** | -0.0040*** | 0.0011*** | 0.0033*** |
| Adj. R2 | | 0.390 | 0.523 | 0.214 | 0.374 |
| Std. Err. | | 1.28 | 1.63 | 0.97 | 0.88 |
| AIC | | 113,997 | 130,453 | 94,906 | 88,010 |
| ***: p-value <0.01, **: p-value<0.05, *: p-value<0.1 | | | | | |

Table S4. Ordinary least squared (OLS) estimation results at the block level (N=4,553)

| Variable | | Spring  LST | Summer LST | Autumn LST | Winter  LST |
| --- | --- | --- | --- | --- | --- |
| Constant | | 12.866*** | 33.767*** | 7.1954*** | -7.1915*** |
| NDVI | | 4.6396*** | -4.5857*** | 9.1271*** | 7.2993*** |
| Albedo | | 0.5183*** | 0.1791*** | 0.3535*** | 0.5699*** |
| Land use  type proportion | Residential | -0.0012 | 0.0217*** | 0.0139*** | 0.0073*** |
| Commercial | 0.0157*** | 0.0397*** | 0.0253*** | 0.0145*** |
| Industrial | 0.0427*** | 0.1208*** | 0.0593*** | 0.0147*** |
| Cultural & Recreational | 0.0454*** | 0.0678*** | 0.0280*** | 0.0182*** |
| Transport | -0.0002 | 0.0207*** | 0.0106*** | 0.0064*** |
| Public | 0.0001 | 0.0447*** | 0.0022 | -0.0151*** |
| Land use diversity | Entropy Index | 0.0954 | 0.6955*** | -0.0445 | -0.0096 |
| Building  2-D form | Building Density (/1km2) | 0.0233*** | 0.0354*** | 0.0071*** | 0.0004 |
| % of old buildings (+35 years) | 0.0101*** | 0.0145*** | 0.0013** | 0.0001 |
| Average building coverage ratio | 0.0057*** | 0.0115*** | 0.0031*** | 0.0026*** |
| Building  3-D form | Average floor area ratio | -0.0011*** | -0.0019*** | -0.0002* | -0.0003* |
| Average total floor area | 0.0000 | -0.0000 | -1.8e-06* | -2.4e-06*** |
| Average building height | -0.0051*** | -0.0034** | -0.0009 | -0.0028*** |
| Natural area | Gravity index for urban forests | -0.0008** | -0.0084*** | -0.0025*** | -0.0031*** |
| Gravity index for water bodies | 0.0007 | -0.0057*** | 0.0010 | 0.0084*** |
| Adj. R2 | | 0.515 | 0.662 | 0.388 | 0.406 |
| Std. Err. | | 0.82 | 1.06 | 0.63 | 0.60 |
| AIC | | 11,102 | 13,437 | 8,720 | 8,321 |
| ***: p-value <0.01, **: p-value<0.05, *: p-value<0.1 | | | | | |

Table S3. Spatial error model (SEM) estimation results at the grid level (N=34,135)

| Variable | | Spring  LST | Summer LST | Autumn LST | Winter  LST |
| --- | --- | --- | --- | --- | --- |
| Constant | | 18.227*** | 36.997*** | 11.076*** | -4.6217*** |
| NDVI | | 3.4328*** | -3.5413*** | 3.7212*** | 8.6236*** |
| Albedo | | 0.1231*** | 0.0539*** | 0.1292*** | 0.1611*** |
| Land use  type proportion | Residential | 0.0011*** | 0.0096*** | 0.0056*** | 0.0024*** |
| Commercial | 0.0065*** | 0.0156*** | 0.0065*** | 0.0030*** |
| Industrial | 0.0181*** | 0.0319*** | 0.0145*** | 0.0065*** |
| Cultural & Recreational | 0.0182*** | 0.0274*** | 0.0103*** | 0.0068*** |
| Transport | 0.0039*** | 0.0104*** | 0.0071*** | 0.0060*** |
| Public | 0.0082*** | 0.0184*** | 0.0065*** | 0.0026*** |
| Land use diversity | Entropy Index | -0.4549*** | -0.1702*** | -0.2019*** | -0.2297*** |
| Building  2-D form | Count of buildings | 0.0078*** | 0.0104*** | 0.0053*** | 0.0040*** |
| % of old buildings (+35 years) | 0.0017*** | 0.0032*** | 0.0008*** | 0.0006*** |
| Average building coverage ratio | 0.0031*** | 0.0048*** | 0.0011*** | 0.0006*** |
| Building  3-D form | Average floor area ratio | -0.0004*** | -0.0005*** | -0.0001*** | -2.8e-05 |
| Average total floor area | -9.6e-07*** | -1.6e-06*** | -1.8e-06*** | -1.7e-06*** |
| Average building height | -0.0036*** | -0.0047*** | -0.0007*** | -0.0007*** |
| Natural area | Gravity index for urban forests | -0.0037*** | -0.0222*** | -0.0046*** | -0.0077*** |
| Gravity index for water bodies | -0.0001 | -0.0016*** | 0.0002** | 0.0008*** |
| Lambda (λ) | | 0.954*** | 0.957*** | 0.947*** | 0.933*** |
| Adj. R2 | | 0.883 | 0.917 | 0.848 | 0.832 |
| Std. Err. | | 0.53 | 0.65 | 0.40 | 0.43 |
| AIC | | 62,718 | 76,800 | 43,868 | 47,812 |
| ***: p-value <0.01, **: p-value<0.05, *: p-value<0.1 | | | | | |

Table S4. Spatial error model (SEM) estimation results at the block level (N=4,553)

| Variable | | Spring  LST | Summer LST | Autumn LST | Winter  LST |
| --- | --- | --- | --- | --- | --- |
| Constant | | 14.345*** | 36.455*** | 8.4268*** | -7.304*** |
| NDVI | | 3.2705*** | -6.3639*** | 6.4654*** | 9.7872*** |
| Albedo | | 0.4422*** | 0.1191*** | 0.3121*** | 0.4547*** |
| Land use  type proportion | Residential | 0.0018 | 0.0161*** | 0.0099*** | 0.0060*** |
| Commercial | 0.0112*** | 0.0272*** | 0.0146*** | 0.0080*** |
| Industrial | 0.0424*** | 0.0935*** | 0.0370*** | 0.0167*** |
| Cultural & Recreational | 0.0445*** | 0.0649*** | 0.0242*** | 0.0203*** |
| Transport | 0.0057*** | 0.0203*** | 0.0117*** | 0.0119*** |
| Public | 0.0061** | 0.0396*** | 0.0072*** | -0.0039* |
| Land use diversity | Entropy Index | -0.4582*** | 0.0874 | -0.2372*** | -0.1712** |
| Building  2-D form | Building Density (/1km2) | 0.0190*** | 0.0288*** | 0.0113*** | 0.0089*** |
| % of old buildings (+35 years) | 0.0036*** | 0.0064*** | 0.0012*** | 0.0004 |
| Average building coverage ratio | 0.0053*** | 0.0044*** | 0.0022*** | 0.0017** |
| Building  3-D form | Average floor area ratio | -0.0008*** | -0.0009*** | -0.0002 | 3.1.E-05 |
| Average total floor area | 3.4e-06*** | 2.9e-06*** | -8.6e-07 | -1.4e-06** |
| Average building height | -0.0085*** | -0.0117*** | -0.0025*** | -0.0028*** |
| Natural  area | Gravity index for urban forests | -0.0007** | -0.0064*** | -0.0018*** | -0.0021*** |
| Gravity index for water bodies | 0.0028* | -0.0041** | 0.0037*** | 0.0100*** |
| Lambda (λ) | | 0.752*** | 0.746*** | 0.747*** | 0.782*** |
| Adj. R2 | | 0.741 | 0.829 | 0.693 | 0.660 |
| Std. Err. | | 0.59 | 0.75 | 0.46 | 0.45 |
| AIC | | 8,983 | 11,062 | 6,303 | 6,555 |
| ***: p-value <0.01, **: p-value<0.05, *: p-value<0.1 | | | | | |

Table S5. Spatial lag model (SLM) estimation results at the grid level (N=34,135).

| Variable | | Spring  LST | Summer LST | Autumn LST | Winter  LST |
| --- | --- | --- | --- | --- | --- |
| Constant | | 6.7784*** | 22.427*** | 2.7371*** | -2.4445*** |
| NDVI | | 3.1671*** | -5.9977*** | 4.9167*** | 6.8601*** |
| Albedo | | 0.2038*** | 0.0688*** | 0.0976*** | 0.1299*** |
| Land use  type proportion | Residential | -0.0050*** | 0.0058*** | 0.0049*** | 0.0024*** |
| Commercial | 0.0060*** | 0.0184*** | 0.0095*** | 0.0034*** |
| Industrial | 0.0239*** | 0.0569*** | 0.0239*** | 0.0042*** |
| Cultural & Recreational | 0.0182*** | 0.0372*** | 0.0127*** | 0.0061*** |
| Transport | -0.0002 | 0.0120*** | 0.0075*** | 0.0052*** |
| Public | 0.0053*** | 0.0234*** | 0.0084*** | 0.0021*** |
| Land use diversity | Entropy Index | -1.2344*** | -0.9964*** | -0.6235*** | -0.1865*** |
| Building  2-D form | Count of buildings | 0.0107*** | 0.0171*** | 0.0053*** | 0.0022*** |
| % of old buildings (+35 years) | 0.0023*** | 0.0053*** | 0.0008*** | 0.0007*** |
| Average building coverage ratio | 0.0065*** | 0.0108*** | 0.0025*** | 0.0014*** |
| Building  3-D form | Average floor area ratio | -0.0009*** | -0.0017*** | -0.0003*** | -0.0001*** |
| Average total floor area | -3.9e-06*** | -3.5e-06*** | -3.2e-06*** | -3.0e-06*** |
| Average building height | -0.0065*** | -0.0092*** | -0.0010*** | 0.0009*** |
| Natural  area | Gravity index for urban forests | 0.0011*** | -0.0020*** | 0.0009*** | -0.0018*** |
| Gravity index for water bodies | -0.0003** | -0.0023*** | 0.0007*** | 0.0009*** |
| Rho (ρ) | | 0.543*** | 0.425*** | 0.615*** | 0.865*** |
| Adj. R2 | | 0.689 | 0.715 | 0.633 | 0.831 |
| Std. Err. | | 0.92 | 1.26 | 0.66 | 0.46 |
| AIC | | 92,781 | 113,980 | 71,369 | 49,461 |
| ***: p-value <0.01, **: p-value<0.05, *: p-value<0.1 | | | | | |

Table S6. Spatial lag model (SLM) estimation results at the block level (N=4,553)

| Variable | | Spring  LST | Summer LST | Autumn LST | Winter  LST |
| --- | --- | --- | --- | --- | --- |
| Constant | | 11.339*** | 31.463*** | 5.8661*** | -5.3522*** |
| NDVI | | 4.4035*** | -4.3325*** | 8.4625*** | 7.3708*** |
| Albedo | | 0.4976*** | 0.1784*** | 0.3383*** | 0.4536*** |
| Land use  type proportion | Residential | -0.0011 | 0.0214*** | 0.0128*** | 0.0062*** |
| Commercial | 0.0150*** | 0.0385*** | 0.0230*** | 0.0113*** |
| Industrial | 0.0404*** | 0.1165*** | 0.0534*** | 0.0114*** |
| Cultural & Recreational | 0.0456*** | 0.0671*** | 0.0275*** | 0.0230*** |
| Transport | 0.0004 | 0.0213*** | 0.0104*** | 0.0075*** |
| Public | 0.0001 | 0.0427*** | 0.0016 | -0.0084*** |
| Land use diversity | Entropy Index | 0.0041 | 0.6087*** | -0.1053 | -0.1026 |
| Building  2-D form | Building Density (/1km2) | 0.0217*** | 0.0341*** | 0.0068*** | 0.0022** |
| % of old buildings (+35 years) | 0.0092*** | 0.0136*** | 0.0011** | 0.000 |
| Average building coverage ratio | 0.0057*** | 0.0111*** | 0.0031*** | 0.0009 |
| Building  3-D form | Average floor area ratio | -0.0010*** | -0.0019*** | -0.0002* | 0.000 |
| Average total floor area | 2.1e-06* | 4.7e-07 | -1.2e-06 | -1.7e-06** |
| Average building height | -0.0057*** | -0.0040** | -0.0012 | -0.0030*** |
| Natural  area | Gravity index for urban forests | -0.0003 | -0.0075*** | -0.0019*** | -0.0025*** |
| Gravity index for water bodies | 0.0010 | -0.0053*** | 0.0012* | 0.0050*** |
| Rho (ρ) | | 0.093*** | 0.062*** | 0.130*** | 0.485*** |
| Adj. R2 | | 0.543 | 0.677 | 0.438 | 0.581 |
| Std. Err. | | 0.79 | 1.03 | 0.60 | 0.51 |
| AIC | | 10,935 | 13,316 | 8,441 | 7,093 |
| ***: p-value <0.01, **: p-value<0.05, *: p-value<0.1 | | | | | |

Table S7. General spatial model (GSM) estimation results at the grid level (N=34,135).

| Variable | | Spring  LST | Summer LST | Autumn LST | Winter  LST |
| --- | --- | --- | --- | --- | --- |
| Constant | | 2.0475*** | 11.759*** | 1.4901*** | -3.4028*** |
| NDVI | | 3.5077*** | -3.6698*** | 4.0788*** | 9.1573*** |
| Albedo | | 0.1341*** | 0.0573*** | 0.1316*** | 0.1714*** |
| Land use  type proportion | Residential | 0.0005 | 0.0093*** | 0.0060*** | 0.0028*** |
| Commercial | 0.0065*** | 0.0153*** | 0.0071*** | 0.0036*** |
| Industrial | 0.0186*** | 0.0340*** | 0.0159*** | 0.0067*** |
| Cultural & Recreational | 0.0193*** | 0.0303*** | 0.0115*** | 0.0076*** |
| Transport | 0.0031*** | 0.0101*** | 0.0073*** | 0.0062*** |
| Public | 0.0071*** | 0.0184*** | 0.0064*** | 0.0020*** |
| Land use diversity | Entropy Index | -0.5538*** | -0.2345*** | -0.2339*** | -0.2575*** |
| Building  2-D form | Count of buildings | 0.0072*** | 0.0100*** | 0.0050*** | 0.0035*** |
| % of old buildings (+35 years) | 0.0017*** | 0.0032*** | 0.0009*** | 0.0006*** |
| Average building coverage ratio | 0.0034*** | 0.0051*** | 0.0013*** | 0.0008*** |
| Building  3-D form | Average floor area ratio | -0.0004*** | -0.0006*** | -0.0001*** | -0.0001 |
| Average total floor area | -1.0e-06** | -1.0e-06** | -2.0e-06*** | -2.0e-06*** |
| Average building height | -0.0039*** | -0.0052*** | -0.0005** | -0.0003 |
| Natural  area | Gravity index for urban forests | -0.0018*** | -0.0113*** | -0.0022*** | -0.0030*** |
| Gravity index for water bodies | -0.0002** | -0.0018*** | 0.0001* | 0.0009*** |
| Rho (ρ) | | 0.777*** | 0.685*** | 0.701*** | 0.702*** |
| Lambda (λ) | | 0.647*** | 0.769*** | 0.748*** | 0.662*** |
| Adj. R2 | | 0.892 | 0.923 | 0.857 | 0.841 |
| Std. Err. | | 0.54 | 0.66 | 0.41 | 0.44 |
| AIC | | 37,325 | 51,139 | 19,431 | 23,078 |
| ***: p-value <0.01, **: p-value<0.05, *: p-value<0.1 | | | | | |

Table S8. General spatial model (GSM) estimation results at the block level (N=4,553)

| Variable | | Spring  LST | Summer LST | Autumn LST | Winter  LST |
| --- | --- | --- | --- | --- | --- |
| Constant | | 6.6525*** | 21.347*** | 4.0591*** | -6.499*** |
| NDVI | | 2.9606*** | -5.3722*** | 6.8056*** | 9.1059*** |
| Albedo | | 0.4429*** | 0.1354*** | 0.3110*** | 0.4796*** |
| Land use  type proportion | Residential | 0.0006*** | 0.0179*** | 0.0104*** | 0.0061*** |
| Commercial | 0.0123*** | 0.0291*** | 0.0160*** | 0.0095*** |
| Industrial | 0.0420*** | 0.0972*** | 0.0394*** | 0.0160*** |
| Cultural & Recreational | 0.0463*** | 0.0651*** | 0.0226*** | 0.0192*** |
| Transport | 0.0029*** | 0.0212*** | 0.0114*** | 0.0097*** |
| Public | 0.0052* | 0.0407*** | 0.0066*** | -0.0071*** |
| Land use diversity | Entropy Index | -0.4084*** | 0.1690 | -0.1940** | -0.1257 |
| Building  2-D form | Building Density (/1km2) | 0.0169*** | 0.0268*** | 0.0094*** | 0.0060*** |
| % of old buildings (+35 years) | 0.0046*** | 0.0074*** | 0.0009** | 0.0003 |
| Average building coverage ratio | 0.0044*** | 0.0044*** | 0.0019*** | 0.0010 |
| Building  3-D form | Average floor area ratio | -0.0007*** | -0.0010*** | -0.0002 | 1.0e-05 |
| Average total floor area | 4.0e-06*** | 4.0e-06*** | 0.000 | -1.0e-06 |
| Average building height | -0.0083*** | -0.0108*** | -0.0023*** | -0.0029*** |
| Natural  area | Gravity index for urban forests | -0.0005* | -0.0059*** | -0.0016*** | -0.0021*** |
| Gravity index for water bodies | 0.0013 | -0.0044*** | 0.0025*** | 0.0075*** |
| Rho (ρ) | | 0.388*** | 0.381*** | 0.323*** | 0.259*** |
| Lambda (λ) | | 0.407*** | 0.439*** | 0.539*** | 0.494*** |
| Adj. R2 | | 0.731 | 0.826 | 0.691 | 0.638 |
| Std. Err. | | 0.61 | 0.75 | 0.45 | 0.47 |
| AIC | | 5,655 | 7,664 | 2,962 | 3,312 |
| ***: p-value <0.01, **: p-value<0.05, *: p-value<0.1 | | | | | |
